# Supplementary material
Source: publisher figshare collection journal article supplement (https://tandf.figshare.com/ndownloader/files/11122685)
Supplement: Supplementary file 1 [file 11122685]

## Sheet: List1
Locus	Motif	Clade	Fluorescent dye	Flanking region	Ta (°C)	Elongation time (s)	Size range (bp)	Number of alleles	Forward primer (5´ → 3´)	Reverse primer (5´ → 3´)
Hv AC4	(CA)11	1	VIC	147	56	15	167-171	3	TCAGCACATCATCAGAATCC	CGGTGCGTCAGAGTGTAT
Hv 2-AC107	(CA)21 GA (TA)6	1	VIC	158	57	15	176-214	10	ACTCACACGATGAGCAAAACT	CTGTTTCGAGCGGTTCTCTG
Hv AC40	(AC)16	1	VIC	196	59	15	216-232	5	CCTCTCCGTACTTCCTCGTC	ACTGTTTCGTCGTGCTTGG
Hv 2-AC45	(AC)12	1	PET	113	56	10	130-141	4	TTTGAAGTCGGGTTGCCTAC	CCAAATTCATTTAGGTCAAAGTT
Hv AC209	(AC)8 AG (AT)11	1	PET	181	56	15	197-207	6	TCCTTTTGGTTACATCTCTGCT	CAATCCTCACTTTCGTTTGG
Hv AC30	(CA)22	1	PET	420	54	30	444-466	4	CTGAATTGATCTCCTCTTCTTGT	CGTTTAAGGGGTATTGGAAA
Hv TC14	(TC)10	1	NED	106	57	10	126-132	3	TGTTGATGATATGGCTCTTGC	CTACCGTCCTCACCCTCA
Hv AG29	(AG)28	1	NED	189	52	15	213-247	7	GCTCTTTGGCAAATTCTA	GGTAGGGGTAGGTAGTCAG
Hv AG39	(GA)9	1	NED	282	58	20	296-306	6	GTGACCCCCAACTACCCAAG	GGGACCAAAAGTGTTCTCA
Hv AC115	(CA)14	1	6-FAM	86	56	10	128-134	3	ATGACAAGAGGGCACACA	AATTCAGATCATTTGGCATTGTA
Hv AC62	GA (CA)25	1	6-FAM	148	52	15	164-210	8	TGCAACAAATAAAACTCAAAT	GAAGAAGGAACAACCCAAAA
Hv CAA111	(CAA)19	1	6-FAM	313	57	25	364-403	7	GGGGCATTTAGGACACTTTG	ATGGGGCTTTTGTTGTTGG
Hv 2-AC58	(CA)12	2	VIC	92	54	10	116-118	2	TCTCCCCAAAATGAACACAA	TTCAGACTCACCAAAGTGTGC
Hv 2-AC134	(CA)12	2	VIC	127	57	15	151-153	2	TCTTTCAATCCGTGCAGTCA	TAGGGCAATGAGAGGGAAAA
Hv AC40	(AC)13	2	VIC	196	59	20	222-226	3	CCTCTCCGTACTTCCTCGTC	ACTGTTTCGTCGTGCTTGG
Hv 2-AC53	(CA)12	2	VIC	257	54	25	279-283	3	TTTAGAACTACATTTCAACAACAAA	TTTGCTTTCCATCATCACTCA
Hv 2-AC107	(CA)20 (TA)4	2	PET	160	57	15	194-200	5	ACTCACACGATGAGCAAAACT	CTGTTTCGAGCGGTTCTCTG
Hv TC14	(TC)11	2	NED	106	57	10	126-128	2	TGTTGATGATATGGCTCTTGC	CTACCGTCCTCACCCTCA
Hv 2-AC90	(CA)13	2	NED	147	57	15	173-209	6	TAATTTGTGGATTGGCGTTG	TTTCTAAGGTTGCAAAATAGACCTC
Hv 2-AC74	(AC)15	2	NED	230	59	20	258-260	2	ATAACTGCCCCACCACCA	TTCTGAGTGCCCGAGTGAG
Hv 2-AC141	(AC)12	2	6-FAM	128	57	15	152-154	2	TGAAGGTTGTTCACATGGTGTC	TTGAAGGCTGAATTGGGTTT
Hv AC62	(CA)11	2	6-FAM	148	52	15	170-174	2	TGCAACAAATAAAACTCAAAT	GAAGAAGGAACAACCCAAAA
Hv CAA111	(CAA)20	2	6-FAM	313	57	25	353-392	6	GGGGCATTTAGGACACTTTG	ATGGGGCTTTTGTTGTTGG
